# Supplementary material for: Glutathione modified low molecular weight PEI for highly improved gene transfection ability and biocompatibility
Source: Royal Society of Chemistry journal article supplement (doi:10.1039/c9nj02396h), 2019-01-01
Supplement: c9nj02396h9.pdf [file c9nj02396h9.pdf]

Journal: *New Journal of Chemistry*

Electronic Supplementary Information

**Glutathione modified low molecular weight PEI for highly  
improved gene transfection ability and biocompatibility**

Yu-Rong Zhan, Qing-Ying Yu, Ji Zhang\*, Yan-Hong Liu, Ya-Ping Xiao, Ju-Hui Zhang, Xi He,  
and Xiao-Qi Yu\*

*Key Laboratory of Green Chemistry and Technology (Ministry of Education), College of Chemistry, Sichuan  
University, Chengdu 610064, P. R. China*

\*Corresponding authors: jzhang@scu.edu.cn (J. Zhang); xqyu@scu.edu.cn (X.-Q. Yu).

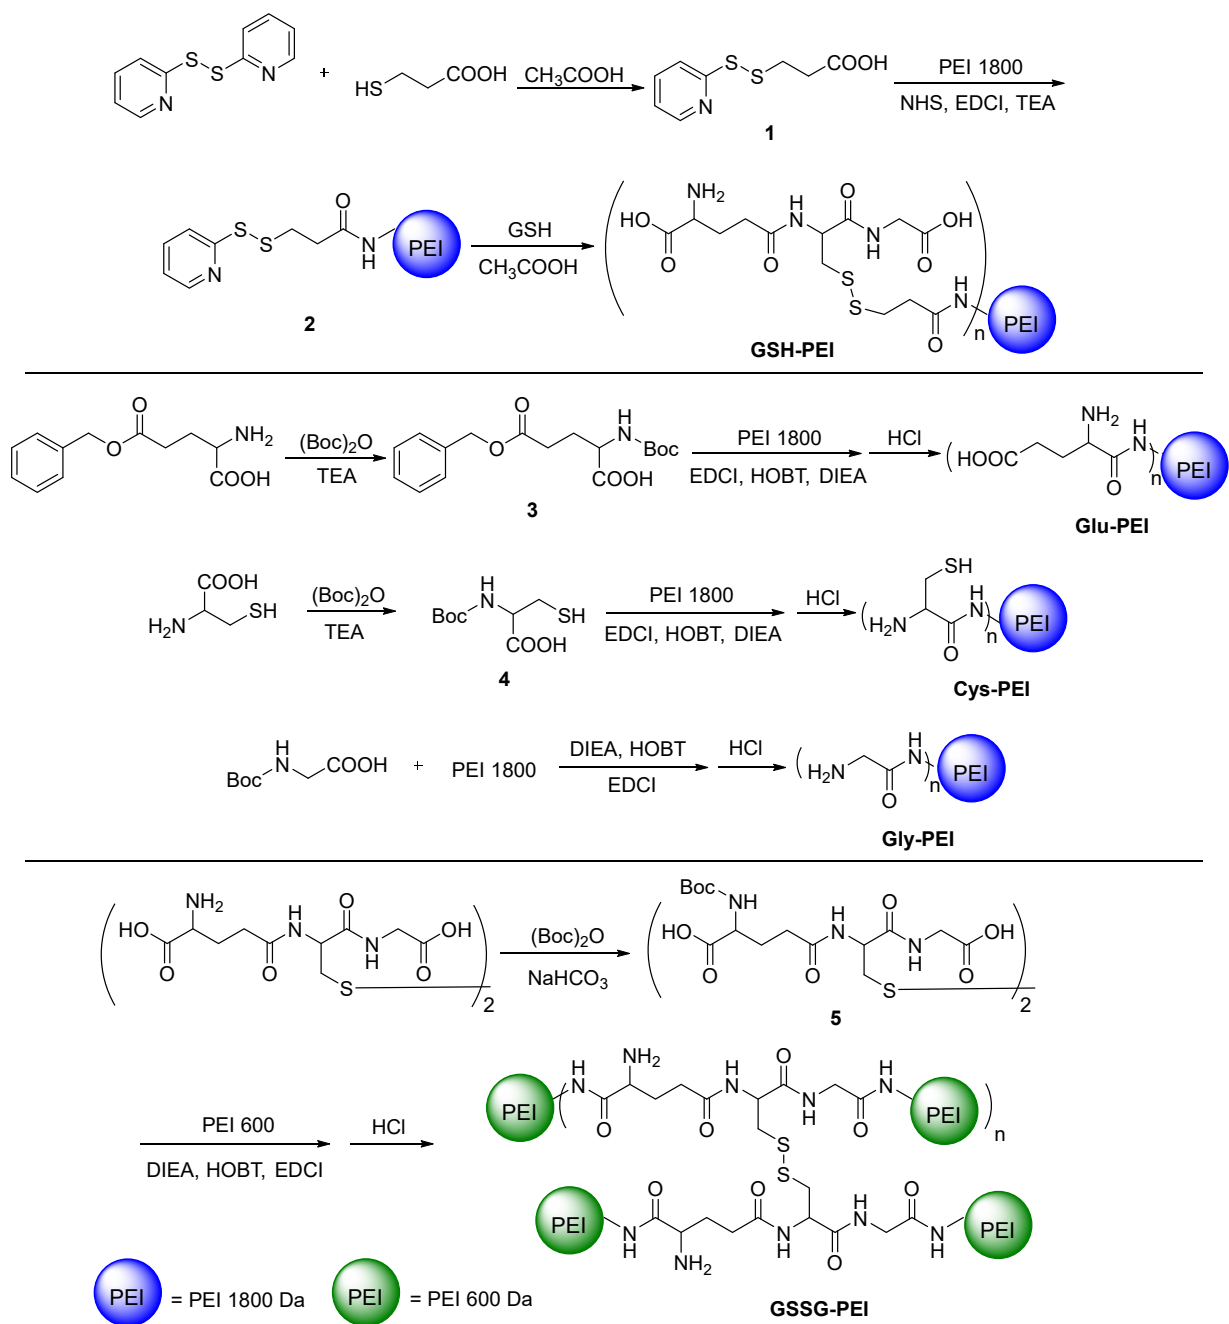

**Scheme S1.** Detailed preparation route of the polymers.

**Table S1.** Calculated SD of polymers modified with amino acid / GSH according to <sup>1</sup>H NMR spectra.

| Pendant | Feed ratios (%) | Calculated SD (%) |
|---------|-----------------|-------------------|
| GSH     | 10              | 6.7               |
|         | 20              | 8.7*              |
|         | 30              | 12.5              |
| Glu     | 10              | 8.1*              |
|         | 20              | 10.3              |
|         | 30              | 10.8              |
|         | 50              | 9.7               |
| Cys     | 10              | 4.2               |
|         | 20              | 5.7               |
|         | 30              | 6.8               |
|         | 50              | 9.4*              |
| Gly     | 10              | 3.8               |
|         | 20              | 12.2*             |
|         | 30              | 13.4              |
|         | 50              | 19.2              |

\* The polymers used in this study.

**Table S2.** M<sub>w</sub> and PDI of polymers measured by GPC.

| Polymers       | Gly-PEI | Cys-PEI | Glu-PEI | GSH-PEI | GSSG-PEI |
|----------------|---------|---------|---------|---------|----------|
| M <sub>w</sub> | 5600    | 5300    | 4300    | 7100    | 7400     |
| PDI            | 1.15    | 1.10    | 1.10    | 1.23    | 1.71     |

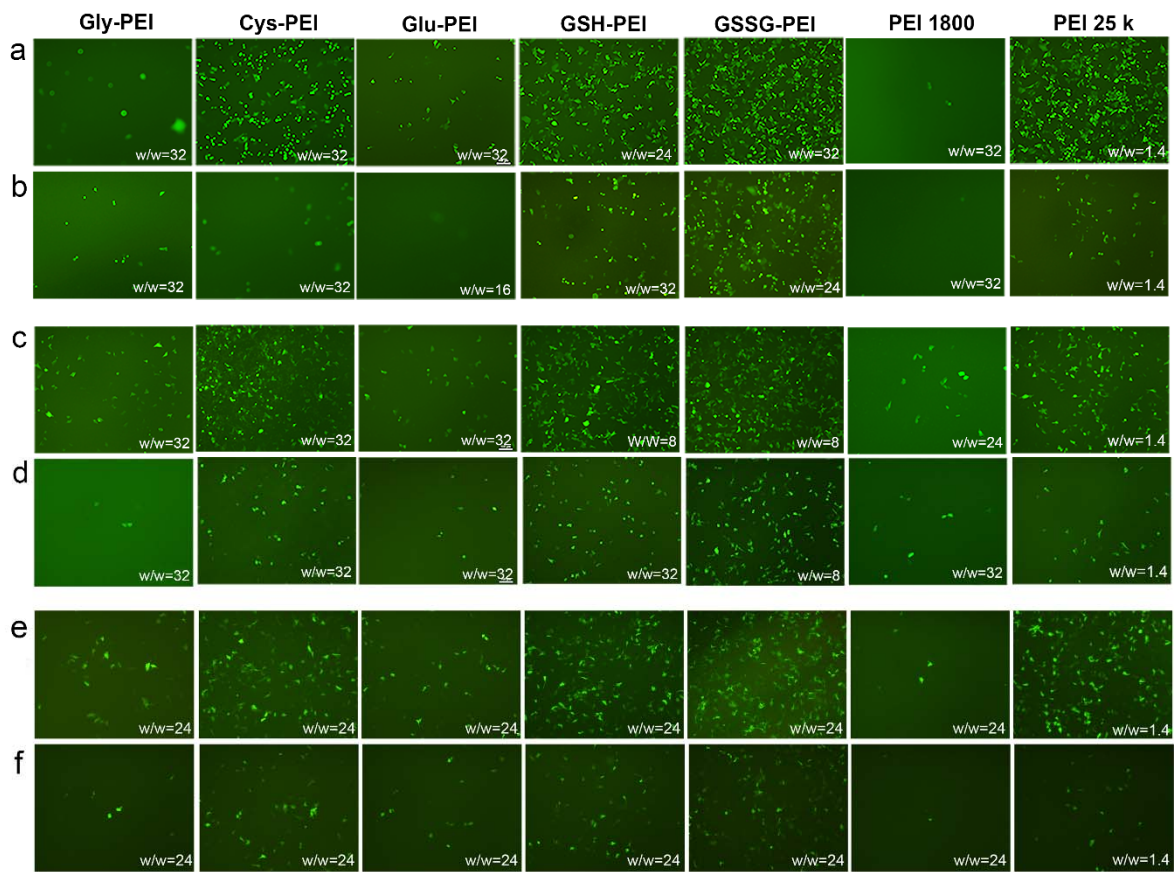

**Figure S1.** EGFP gene expression in HeLa (a & b), 7702 (c & d) and HEK293 (e & f) cells. a/c/e: Without serum; b/d/f: With serum.

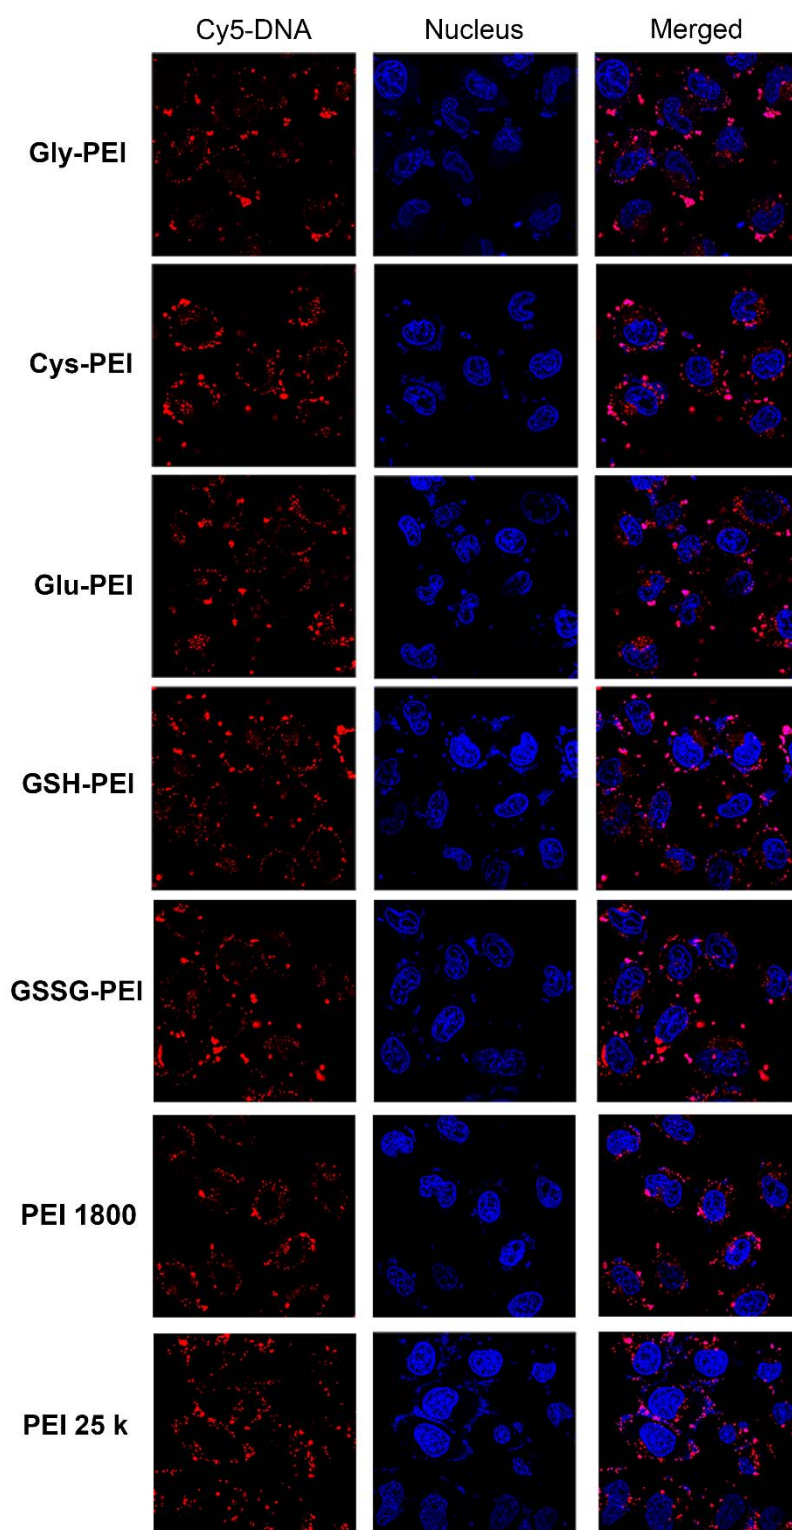

**Figure S2.** CLSM images in HeLa cells with serum after 4 h of transfection. w/w (polymer / DNA) = 1.4 for PEI 25 kDa and 24 for other materials. Cy5-labeled DNA (red) and Hoechst 33342 stained nucleus (blue).

# GSH-PEI

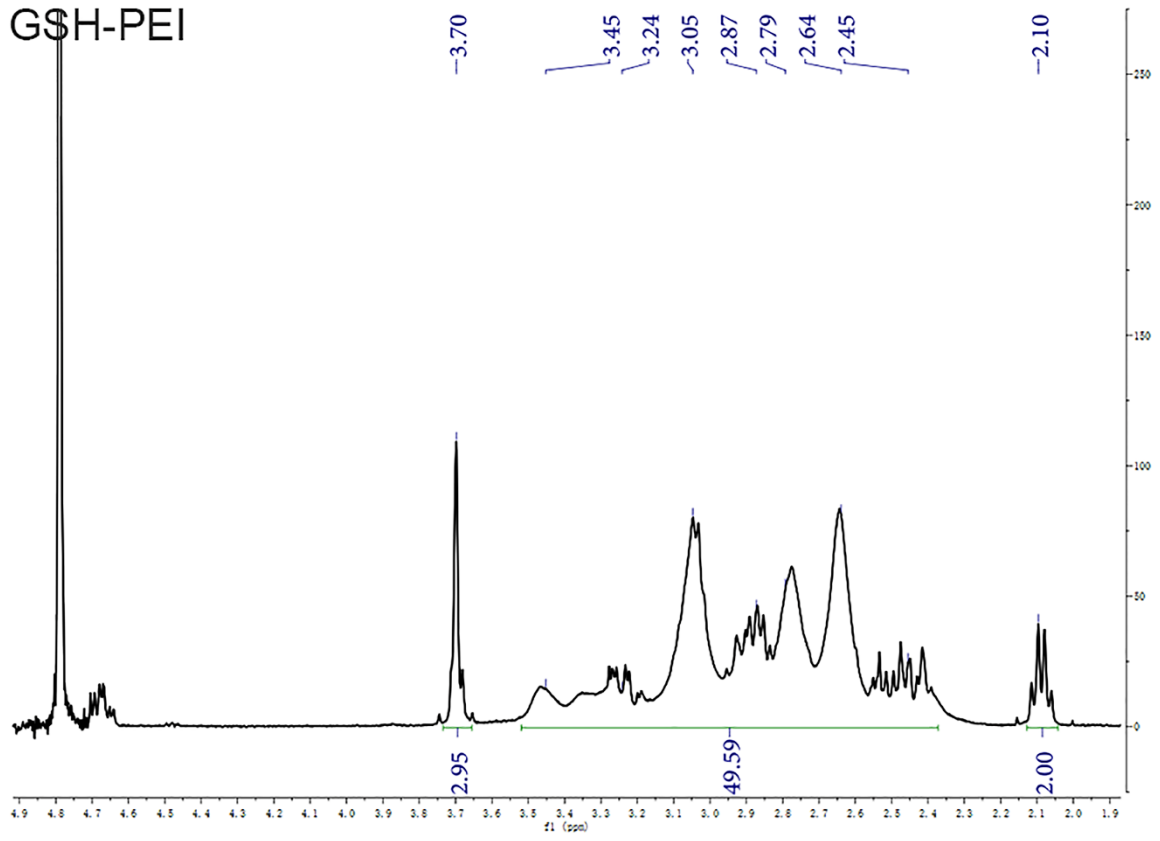

# Glu-PEI

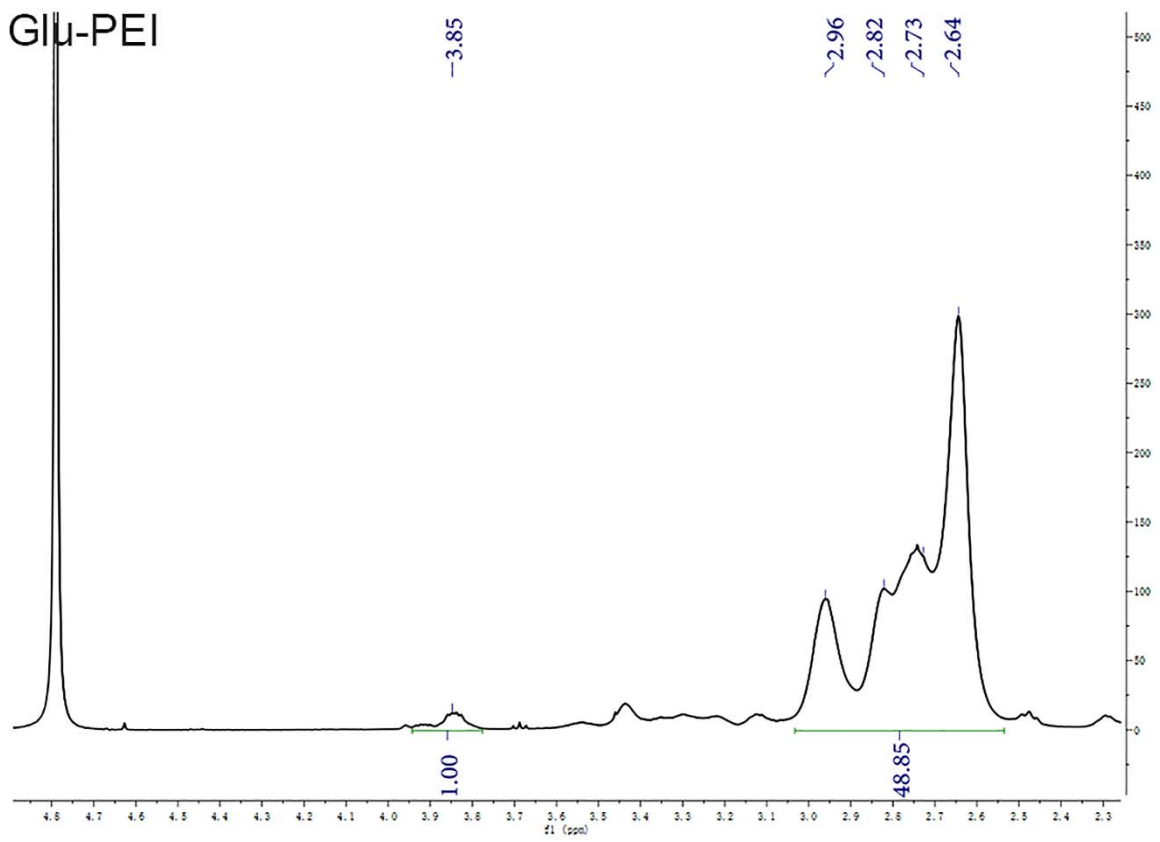

# Cys-PEI

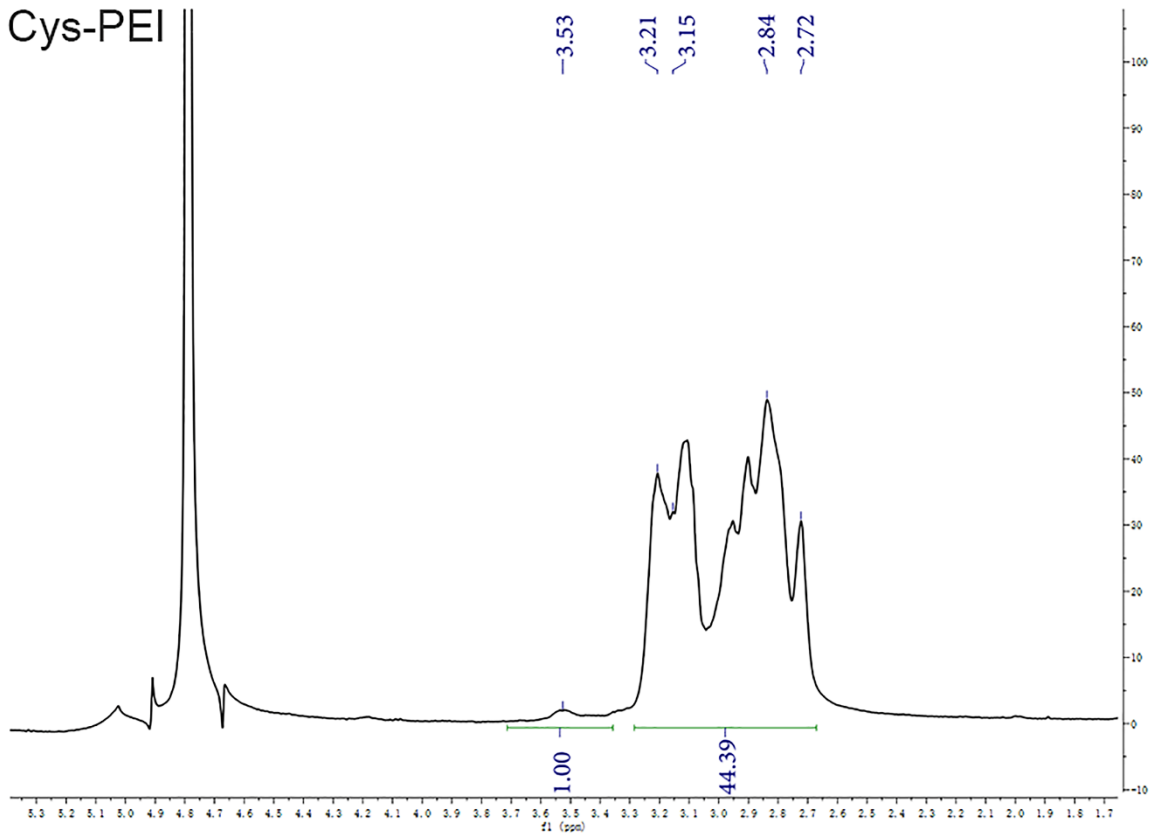

# Gly-PEI

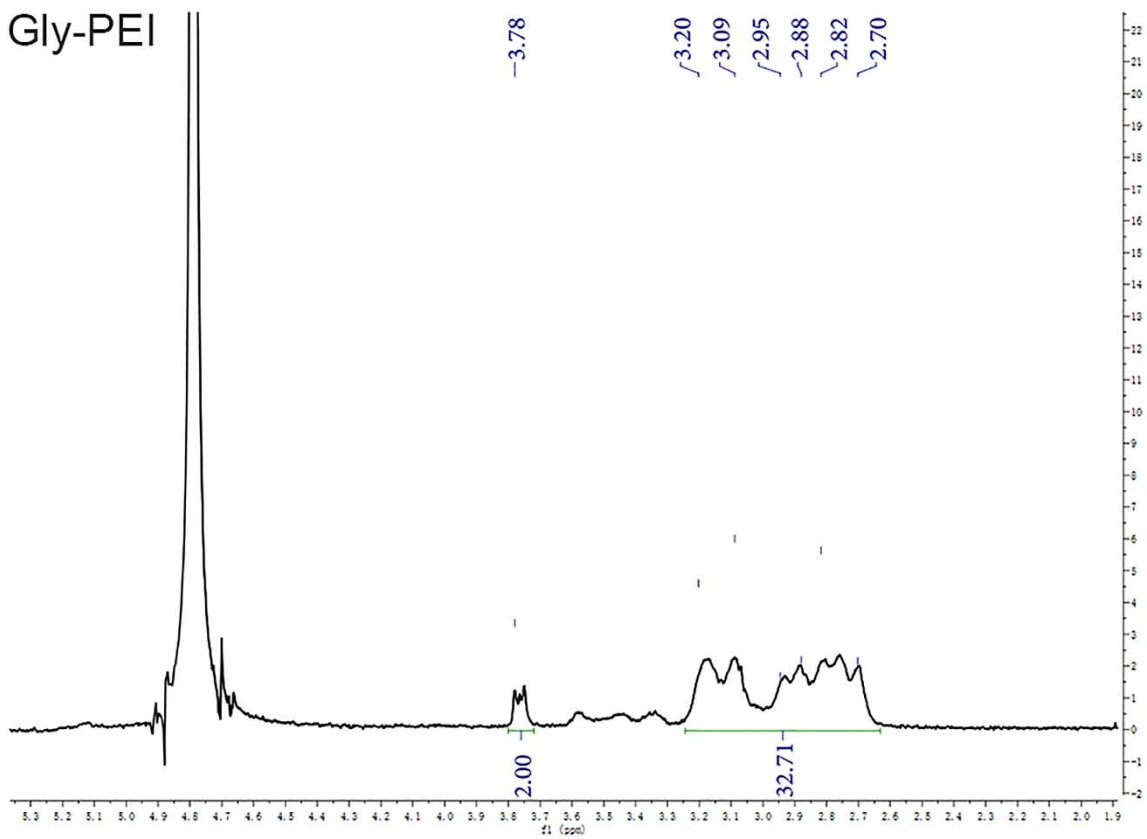

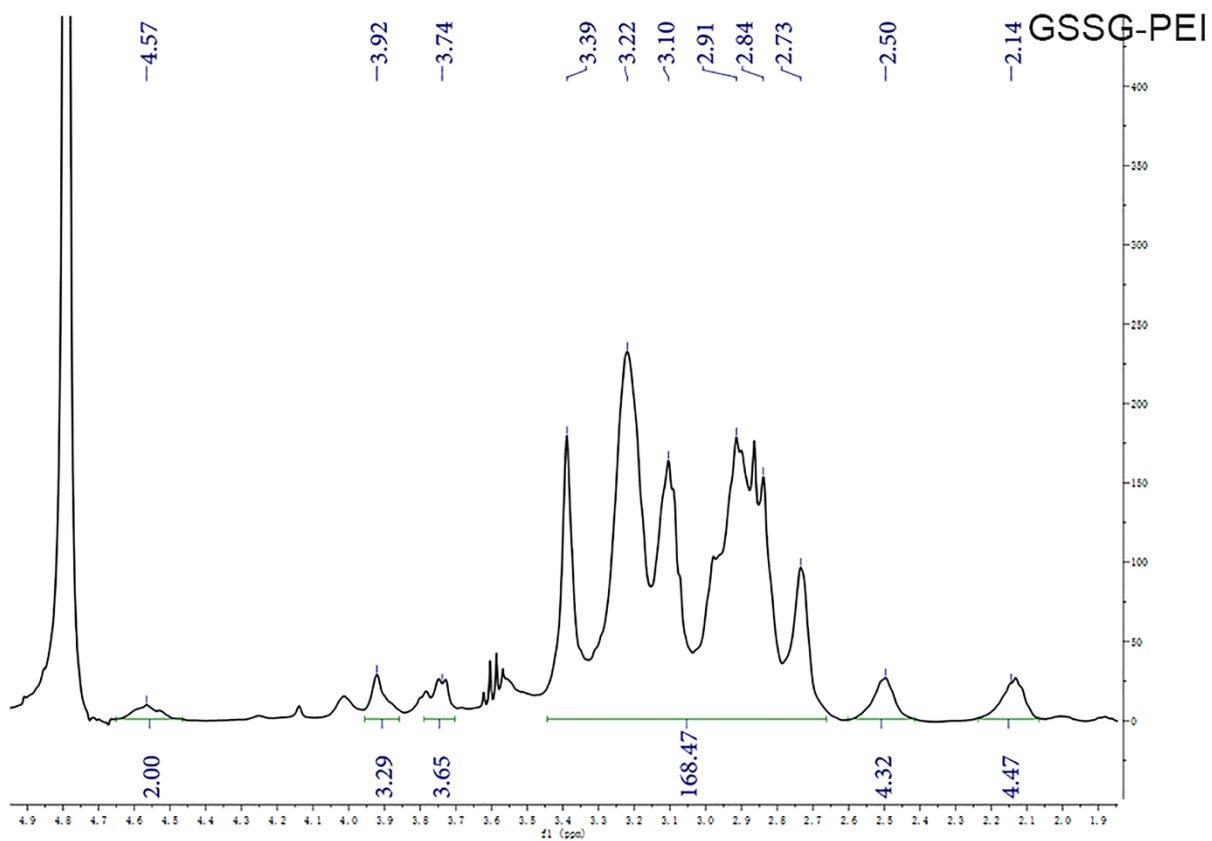

**Figure S3.**  $^1\text{H}$  NMR spectra (400 MHz,  $\text{D}_2\text{O}$ ) of polymers.
