# Supplementary figures and images for: Glutathione modified low molecular weight PEI for highly improved gene transfection ability and biocompatibility
Source: Royal Society of Chemistry journal article supplement (doi:10.1039/c9nj02396h), 2019-01-01

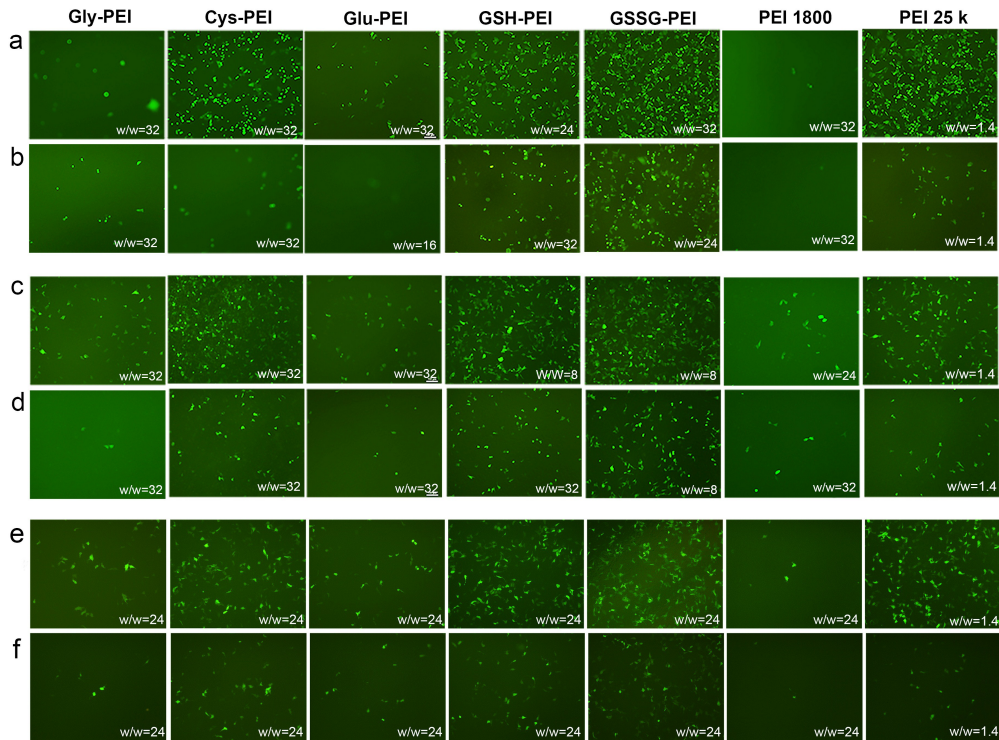

Supplement: c9nj02396h2.pdf [file c9nj02396h2.pdf]

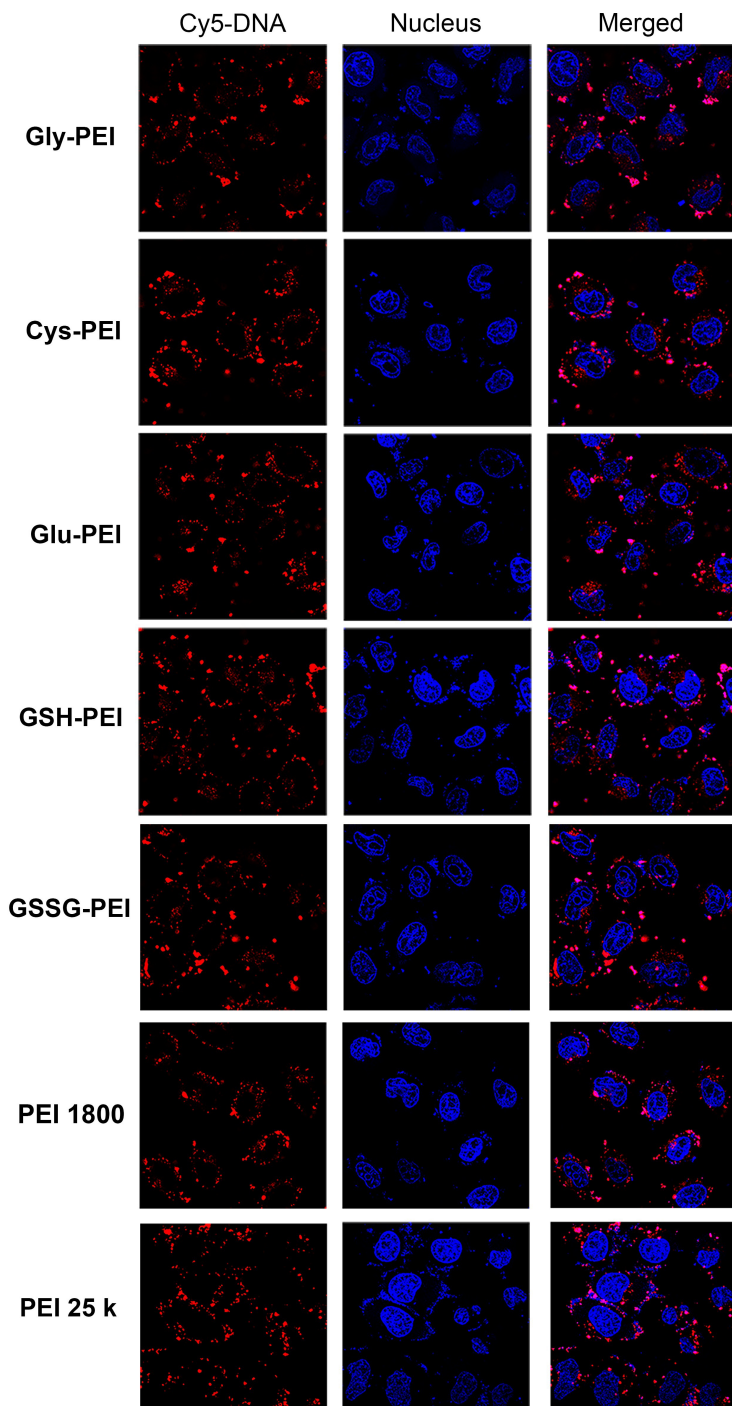

Supplement: c9nj02396h3.pdf [file c9nj02396h3.pdf]

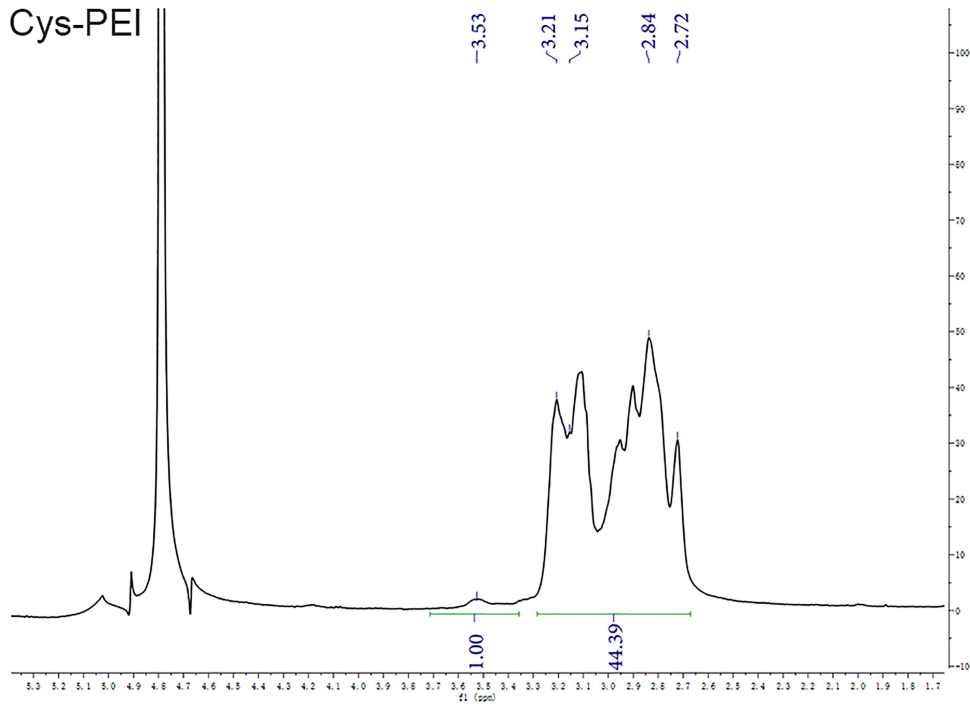

Supplement: c9nj02396h4.pdf [file c9nj02396h4.pdf]

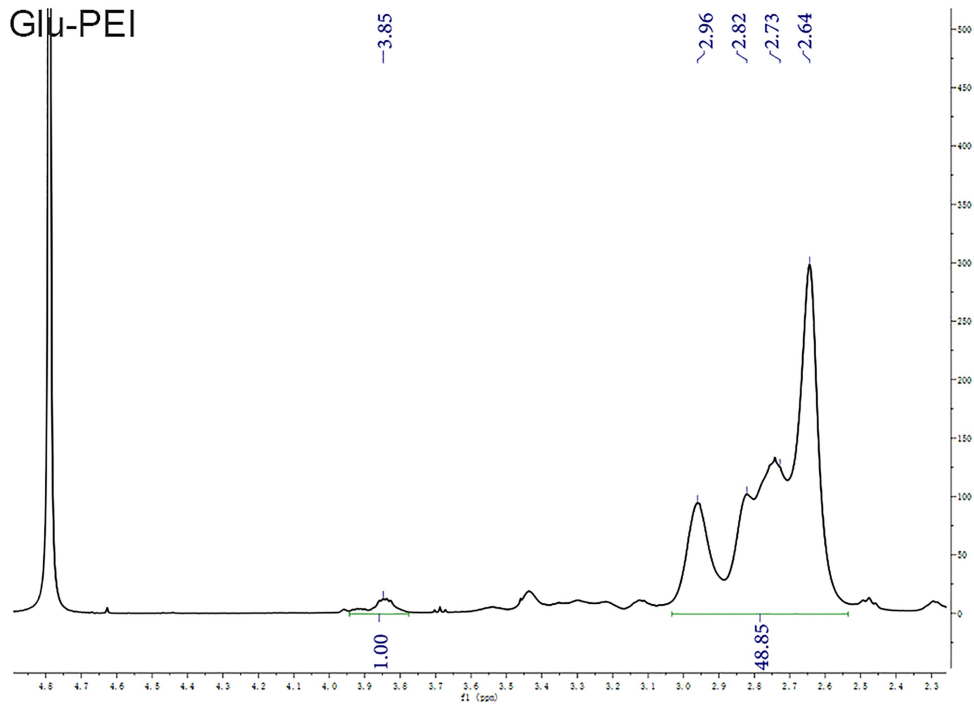

Supplement: c9nj02396h5.pdf [file c9nj02396h5.pdf]

Gly-PEI

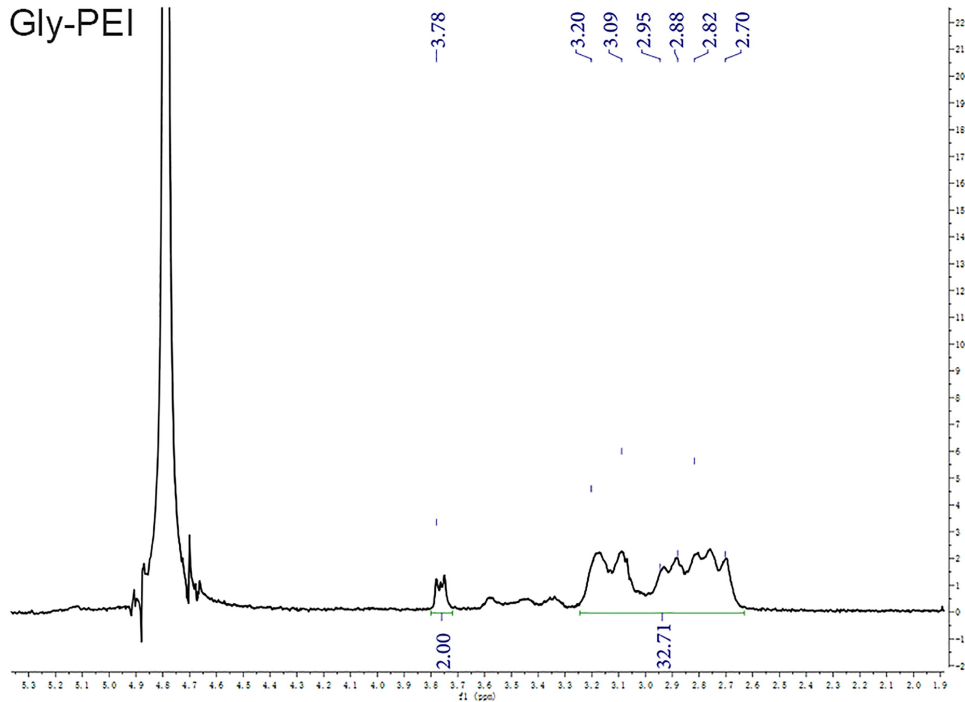

Supplement: c9nj02396h6.pdf [file c9nj02396h6.pdf]

GSH-PEI

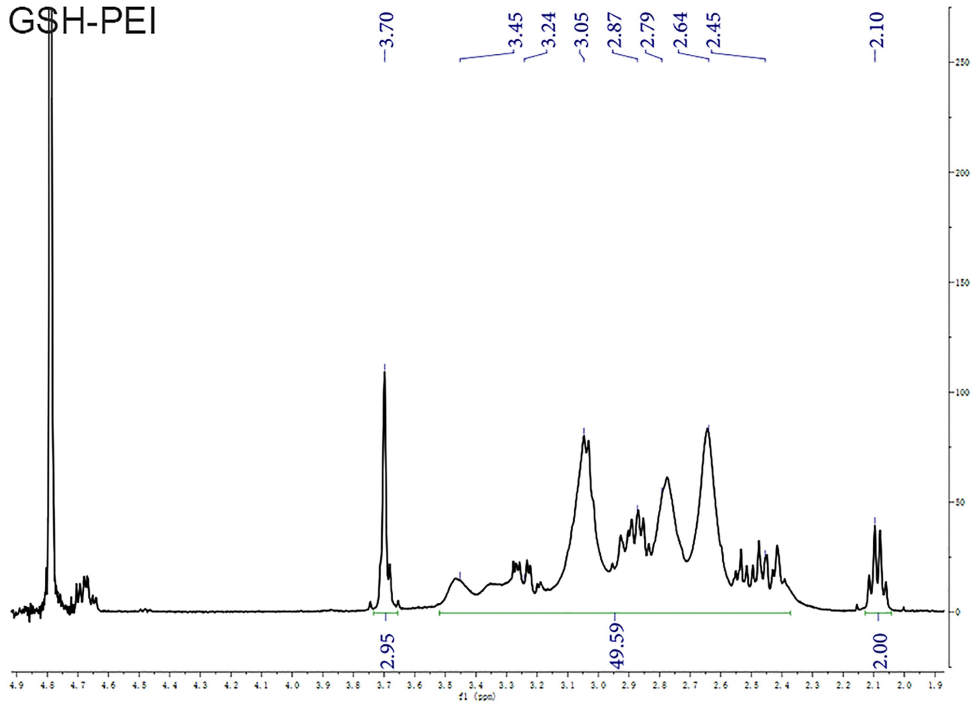

Supplement: c9nj02396h7.pdf [file c9nj02396h7.pdf]

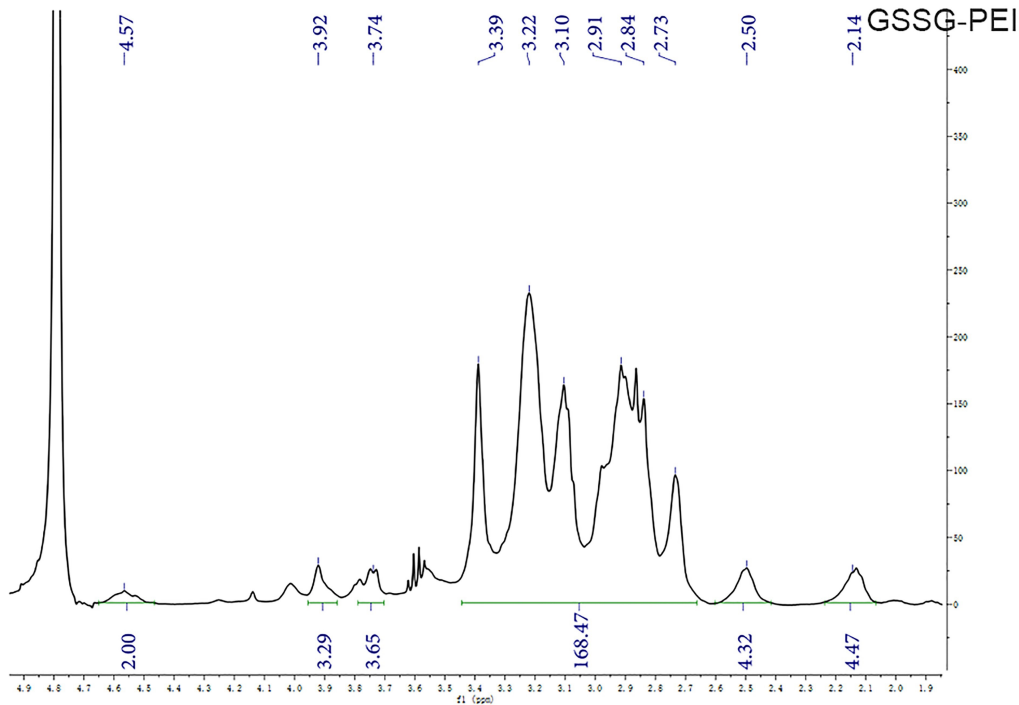

Supplement: c9nj02396h8.pdf [file c9nj02396h8.pdf]
